# Supplementary material
Source: MDPI journal article supplement (https://www.mdpi.com/2076-3298/9/3/39)
Supplement: s1 [file s1]

Supplementary material

# Evaluating the Use of Alternative Normalization Approaches on SARS-CoV-2 Concentrations in Wastewater: Experiences from Two Catchments in Northern Sweden

Frida Isaksson <sup>1</sup>, Lian Lundy <sup>1,\*</sup>, Annelie Hedström <sup>1</sup>, Anna J. Székely <sup>2</sup> and Nahla Mohamed <sup>2</sup>

<sup>1</sup> Luleå University of Technology; friisa-4@student.ltu.se (F.I.); annelie.hedstrom@ltu.se (A.H.)

<sup>2</sup> Swedish University of Agricultural Science; anna.szekely@slu.se (A.J.S.); nahala.mohamed@slu.se (N.M.)

\* Correspondence: lian.lundy@ltu.se

**Table S1.** Content of total nitrogen (TN) in domestic wastewater (expressed as g/p/d) based on literature values of excretion in faeces and urine as well as contribution from greywater.

| TN1 [1] | TN2 [2] | TN3 [3] | TN4 [4] |
|---------|---------|---------|---------|
| 14.0    | 13.9    | 12.5    | 11.0    |

**Table S2.** Content of total phosphorous (TP) in domestic wastewater (expressed as g/p/d) based on literature values of excretion in faeces and urine as well as contribution from greywater.

| TP1 [1] | TP2 [2] | TP3 [3] | TP4 [4] |
|---------|---------|---------|---------|
| 2.1     | 2.0     | 1.7     | 1.2     |

**Table S3.** Weekend and weekday average TP and TN population estimations and corresponding relative standard deviation (RSD) at UDD WWTP.

|                        | Population Estimation |         |         |         |
|------------------------|-----------------------|---------|---------|---------|
|                        | TN1                   | TN2     | TN3     | TN4     |
| <b>Weekday average</b> | 77957.6               | 78518.5 | 87312.6 | 99218.8 |
| <b>RSD (%)</b>         |                       |         | 5.7     |         |
| <b>Weekend average</b> | 75802.0               | 76347.3 | 84898.2 | 96475.2 |
| <b>RSD (%)</b>         |                       |         | 4.1     |         |
|                        | TP1                   | TP2     | TP3     | TP4     |
| <b>Weekday average</b> | 55828.3               | 58619.8 | 68964.4 | 97699.6 |
| <b>RSD (%)</b>         |                       |         | 10.6    |         |
| <b>Weekend average</b> | 56821.2               | 59662.3 | 70190.9 | 99437.2 |
| <b>RSD (%)</b>         |                       |         | 6.1     |         |

**Citation:** Isaksson, F.; Lundy, L.; Hedström, A.; Székely, A.J.; Mohamed, N. Evaluating the Use of Alternative Normalization Approaches on SARS-CoV-2 Concentrations in Wastewater: Experiences from Two Catchments in Northern Sweden. *Environments* **2022**, *9*, 39. <https://doi.org/10.3390/environments9030039>

Academic Editor: Tiong Gim Aw

Received: 4 February 2022

Accepted: 17 March 2022

Published: 19 March 2022

**Publisher's Note:** MDPI stays neutral with regard to jurisdictional claims in published maps and institutional affiliations.

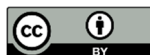

**Copyright:** © 2022 by the authors. Submitted for possible open access publication under the terms and conditions of the Creative Commons Attribution (CC BY) license (<https://creativecommons.org/licenses/by/4.0/>).

**Table S4.** Weekend and weekday average TP and TN population estimations and corresponding relative standard deviation (RSD) at RAN WWTP.

| Population estimation |        |        |        |        |
|-----------------------|--------|--------|--------|--------|
|                       | TN1    | TN2    | TN3    | TN4    |
| Weekday average       | 1956.9 | 1971.0 | 2191.8 | 2490.6 |
| RSD (%)               |        |        | 24.5   |        |
| Weekend average       | 1923.6 | 1937.5 | 2154.5 | 2448.3 |
| RSD (%)               |        |        | 8.3    |        |
|                       | TP1    | TP2    | TP3    | TP4    |
| Weekday average       | 1395.9 | 1465.7 | 1724.4 | 2442.9 |
| RSD (%)               |        |        | 25.4   |        |
| Weekend average       | 1725.3 | 1811.5 | 2131.2 | 3019.2 |
| RSD (%)               |        |        | 29.1   |        |

**Table S5.** UDD WWTP Ct values and calculated Ct difference between replicates as well as calculated concentrations in each sample. Each replicate is based on an average value from RT-qPCR triplicates targeting the N1 gene of SARS-CoV-2.

| Sample ID | Sample date | Ct (#) |       |               | Concentration (copies/mL) |        |
|-----------|-------------|--------|-------|---------------|---------------------------|--------|
|           |             | Rep 1  | Rep 2 | Ct difference | Rep 1                     | Rep 2  |
| UDD 1     | 2021-01-13  | 32.14  | 32.58 | -0.44         | 50.71                     | 37.22  |
| UDD 2     | 2021-01-19  | 32.56  | 32.44 | 0.12          | 37.82                     | 41.26  |
| UDD 3     | 2021-01-22  | 33.20  | 33.45 | -0.25         | 24.26                     | 20.33  |
| UDD 4     | 2021-01-25  | 32.77  | 33.11 | -0.34         | 32.63                     | 25.86  |
| UDD 5     | 2021-01-27  | 33.16  | 32.20 | 0.96*         | 24.86                     | 48.56  |
| UDD 6     | 2021-01-29  | 33.26  | 33.48 | -0.22         | 23.30                     | 19.99  |
| UDD 7     | 2021-02-01  | 34.13  | 32.80 | 1.3*          | 12.61                     | 32.01  |
| UDD 8     | 2021-02-03  | 31.72  | 32.34 | -0.62         | 68.29                     | 44.20  |
| UDD 9     | 2021-02-05  | 30.22  | 30.43 | -0.21         | 193.66                    | 167.65 |
| UDD 10    | 2021-02-08  | 30.89  | 31.09 | -0.20         | 121.51                    | 105.91 |
| UDD 11    | 2021-02-10  | 33.34  | 34.45 | -1.1*         | 21.94                     | 10.11  |
| UDD 12    | 2021-02-12  | 32.26  | 32.02 | 0.24          | 46.68                     | 55.11  |
| UDD 13    | 2021-02-15  | 31.13  | 30.19 | 0.94*         | 102.76                    | 197.84 |
| UDD 14    | 2021-02-17  | 30.20  | 31.13 | -0.93*        | 196.80                    | 103.04 |
| UDD 15    | 2021-02-19  | 30.69  | 30.68 | 0.010         | 140.00                    | 140.26 |
| UDD 16    | 2021-02-22  | 29.95  | 30.06 | -0.11         | 234.00                    | 217.16 |
| UDD 17    | 2021-02-24  | 30.05  | 29.76 | 0.29          | 218.97                    | 267.67 |
| UDD 18    | 2021-02-26  | 30.88  | 30.57 | 0.31          | 122.55                    | 151.47 |
| UDD 19    | 2021-03-01  | 29.87  | 29.21 | 0.66          | 246.70                    | 391.67 |

Key: \*=Ct difference >0.90.

**Table S6.** RAN WWTP Ct values and calculated Ct difference between replicates as well as calculated concentrations in each sample. Each replicate is based on an average value from RT-qPCR triplicates targeting the N1 gene of SARS-CoV-2.

| Sample ID | Sample date | Ct (#) |       |               | Concentration (copies/mL) |       |
|-----------|-------------|--------|-------|---------------|---------------------------|-------|
|           |             | Rep 1  | Rep 2 | Ct difference | Rep 1                     | Rep 2 |
| RAN 1     | 2021-02-01  | 34.76  | 34.06 | 0.70          | 8.15                      | 13.33 |

|        |            |       |       |        |        |        |
|--------|------------|-------|-------|--------|--------|--------|
| RAN 2  | 2021-02-03 | nd    | nd    | -      | nd     | nd     |
| RAN 3  | 2021-02-05 | nd    | nd    | -      | nd     | nd     |
| RAN 4  | 2021-02-08 | nd    | nd    | -      | nd     | nd     |
| RAN 5  | 2021-02-10 | 33.17 | 32.96 | 0.21   | 24.68  | 28.57  |
| RAN 6  | 2021-02-12 | 31.83 | 31.34 | 0.49   | 63.16  | 88.70  |
| RAN 7  | 2021-02-15 | 30.50 | 30.13 | 0.37   | 159.37 | 206.04 |
| RAN 8  | 2021-02-17 | 30.64 | 30.99 | -0.35  | 144.83 | 112.58 |
| RAN 9  | 2021-02-19 | 30.59 | 30.63 | -0.040 | 149.64 | 145.20 |
| RAN 10 | 2021-02-22 | 29.86 | 31.61 | -1.8*  | 248.61 | 73.55  |
| RAN 11 | 2021-02-24 | 30.78 | 31.22 | -0.44  | 131.43 | 96.27  |
| RAN 12 | 2021-02-26 | 30.29 | 30.51 | -0.22  | 184.61 | 158.24 |
| RAN 13 | 2021-03-01 | 31.91 | 31.75 | 0.16   | 59.78  | 66.75  |

**Key:** nd=not detected, \*=Ct difference >0.90.

**Table S7.** UDD WWTP Ct values from RT-qPCR of PMMoV and calculated Ct difference as well as calculated concentrations in each sample replicate. Each replicate is based on an average value from RT-qPCR duplicates.

| Sample ID | Sample date | Ct (#)  |         |               | Concentration (copies/mL) |          |
|-----------|-------------|---------|---------|---------------|---------------------------|----------|
|           |             | Rep 1   | Rep 2   | Ct difference | Rep 1                     | Rep 2    |
| UDD 1     | 2021-01-13  | 23.93   | 24.25   | -0.32         | 49292.4                   | 49828.8  |
| UDD 2     | 2021-01-19  | 24.10   | 23.79   | 0.31          | 43952.6                   | 46150.2  |
| UDD 3     | 2021-01-22  | -       | 23.88   | -             | -                         | 51906.8  |
| UDD 4     | 2021-01-25  | 23.09** | 23.46   | -0.37         | 87786.8                   | 61943.4  |
| UDD 5     | 2021-01-27  | 23.52   | 24.26   | -0.74         | 65509.1                   | 35006.0  |
| UDD 6     | 2021-01-29  | 24.38   | 23.59** | 0.79          | 36119.6                   | 73821.5  |
| UDD 7     | 2021-02-01  | 24.01** | 24.83   | -0.82         | 46762.8                   | 31153.6  |
| UDD 8     | 2021-02-03  | 23.51   | 23.56   | -0.050        | 65629.7                   | 68902.8  |
| UDD 9     | 2021-02-05  | 23.07   | 23.77   | -0.70         | 88902.4                   | 59830.4  |
| UDD 10    | 2021-02-08  | 24.00   | 23.77   | 0.23          | 47044.9                   | 40832.8  |
| UDD 11    | 2021-02-10  | 22.86** | 23.44** | -0.58         | 103016.5                  | 79077.0  |
| UDD 12    | 2021-02-12  | 22.44** | 22.75** | -0.31         | 136938.6                  | 106412.9 |
| UDD 13    | 2021-02-15  | 22.88** | 23.86   | -0.98*        | 101552.8                  | 63789.7  |
| UDD 14    | 2021-02-17  | 23.74   | 23.79   | -0.020        | 55969.9                   | 59227.8  |
| UDD 15    | 2021-02-19  | 23.47   | 23.60   | -0.13         | 67682.8                   | 64280.8  |
| UDD 16    | 2021-02-22  | 24.02   | 23.09** | 0.93*         | 46258.5                   | 102083.3 |
| UDD 17    | 2021-02-24  | 22.65** | 22.27** | 0.38          | 119080.6                  | 154443.5 |
| UDD 18    | 2021-02-26  | 22.82** | 24.99   | -2.2*         | 106038.6                  | 24190.0  |
| UDD 19    | 2021-03-01  | 23.48   | 23.70   | -0.22         | 67129.1                   | 56721.1  |

**Key:** \*=Ct difference >0.90, \*\*= reanalysed samples.

**Table S8.** RAN WWTP Ct values from RT-qPCR of PMMoV and calculated Ct difference as well as calculated concentrations in each sample replicate. Each replicate is based on an average value from RT-qPCR duplicates.

| Sample ID | Sample date | Ct (#) |         |               | Concentration (copies/mL) |          |
|-----------|-------------|--------|---------|---------------|---------------------------|----------|
|           |             | Rep 1  | Rep 2   | Ct difference | Rep 1                     | Rep 2    |
| RAN 1     | 2021-02-01  | 24.41  | 23.78   | 0.63          | 35487.1                   | 54753.8  |
| RAN 2     | 2021-02-03  | 23.92  | 24.16   | -0.24         | 49614.0                   | 41914.9  |
| RAN 3     | 2021-02-05  | 23.02  | 21.99** | 1.0*          | 91920.2                   | 186888.9 |

|        |            |         |         |       |          |          |
|--------|------------|---------|---------|-------|----------|----------|
| RAN 4  | 2021-02-08 | 23.13** | 24.59   | -1.5* | 85470.0  | 31276.2  |
| RAN 5  | 2021-02-10 | 23.41   | 23.24   | 0.17  | 70394.7  | 79329.7  |
| RAN 6  | 2021-02-12 | 23.96   | 23.46   | 0.50  | 48366.2  | 68067.7  |
| RAN 7  | 2021-02-15 | 22.21   | 21.89   | 0.32  | 160840.7 | 200011.2 |
| RAN 8  | 2021-02-17 | 23.22   | 23.53** | -0.31 | 80258.6  | 64954.7  |
| RAN 9  | 2021-02-19 | 24.31** | 24.59** | -0.28 | 37976.3  | 31313.3  |
| RAN 10 | 2021-02-22 | 23.42   | 23.13** | 0.29  | 70018.5  | 85170.7  |
| RAN 11 | 2021-02-24 | 24.56** | 23.43   | 1.1*  | 31936.9  | 69656.6  |
| RAN 12 | 2021-02-26 | 23.66   | 23.51** | 0.15  | 59123.9  | 65547.6  |
| RAN 13 | 2021-03-01 | 23.16   | 22.42   | 0.74  | 83866.1  | 139092.2 |

Key: \*=Ct difference >0.90, \*\*= reanalysed samples.

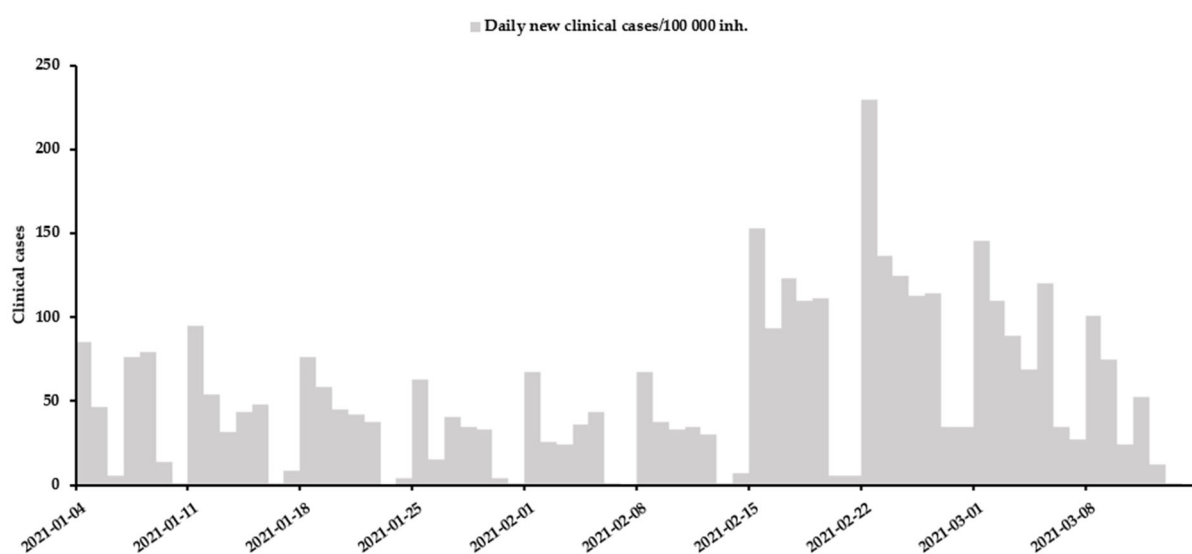

(a)

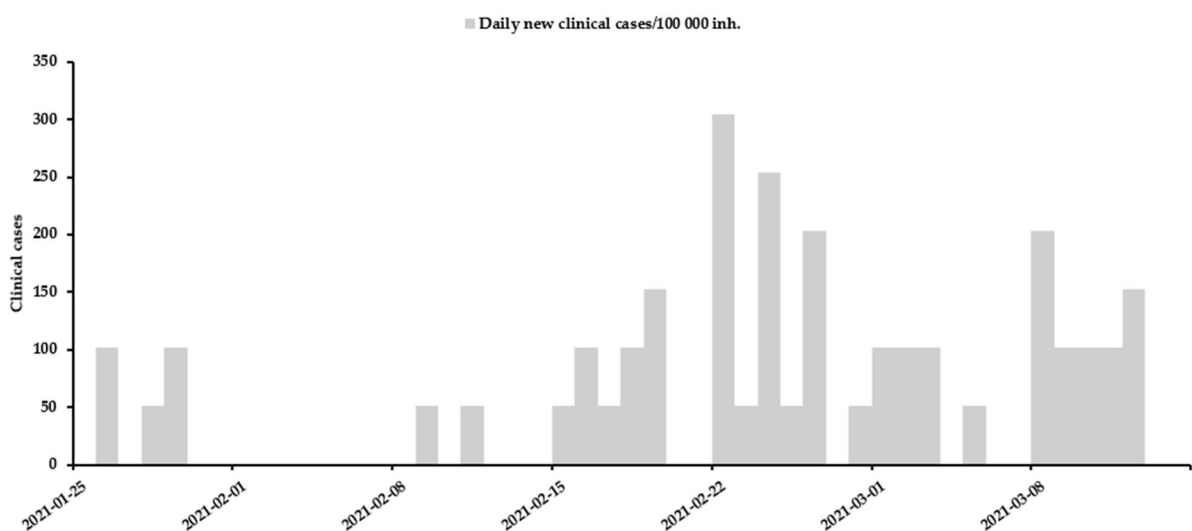

(b)

**Figure S1.** Daily new clinical cases per 100 000 inh. over the sampling period in the catchment area of: (a) UDD WWTP and (b) RAN WWTP. The datemark display is held on the first Monday of every new week.

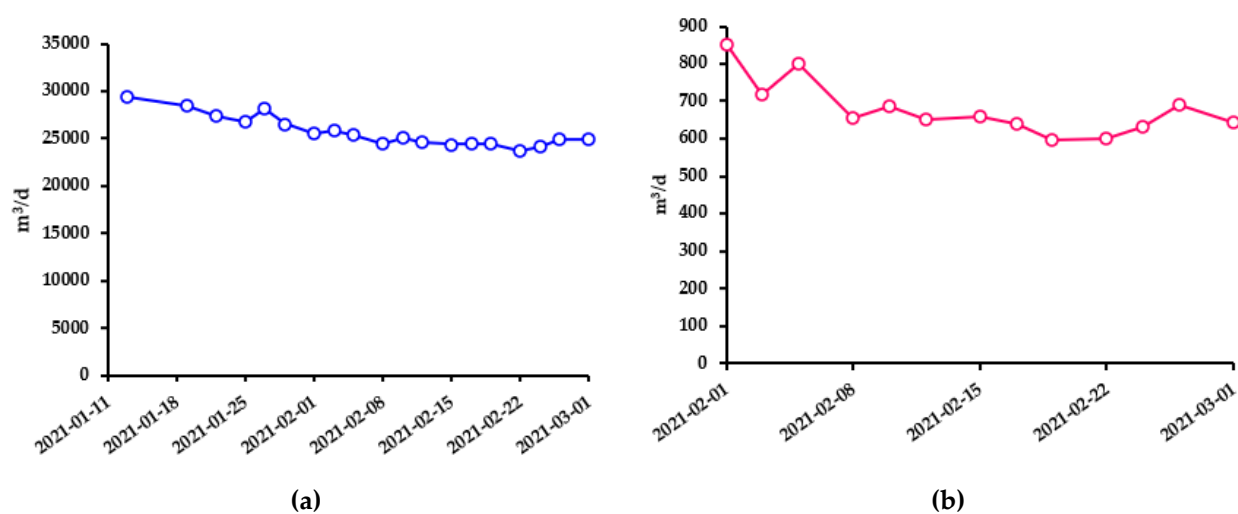

Figure S2. Average daily WWTP flow over the sampling period at: (a) UDD WWTP and (b) RAN WWTP.

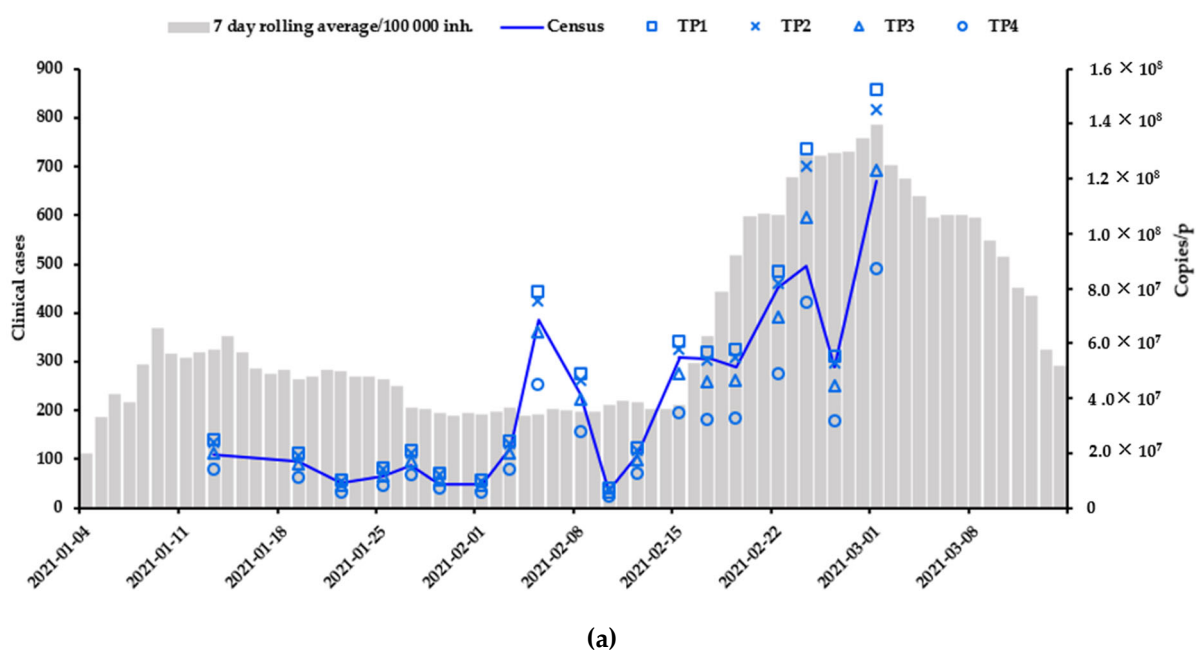

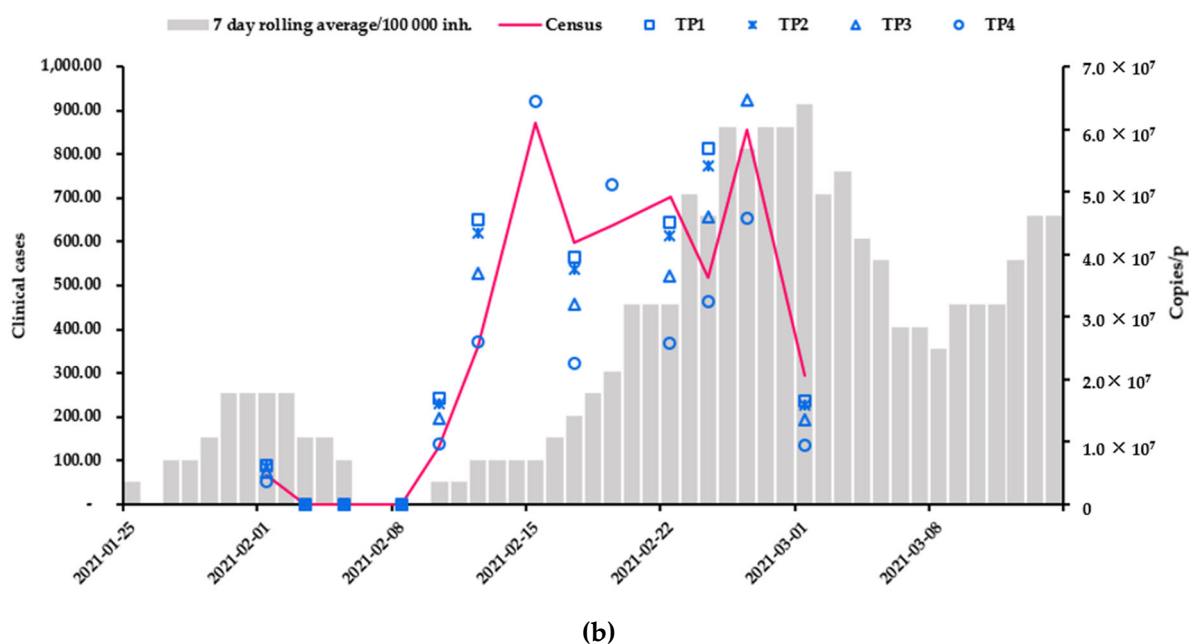

**Figure S3.** Longitudinal data of SARS-CoV-2 viral loads normalized to census population (census) and TP estimated population size (TP1-TP5) benchmarked with daily new clinical cases per 100 000 inh. based on day of testing at: (a) UDD WWTP and (b) RAN WWTP. The datemark display is held on the first Monday of every new week.

## References

1. Jönsson, H.; Baky, A.; Jeppsson, U.; Hellström, D.; Kärrman, E. Composition of urine, faeces, greywater and biowaste for utilization in the URWARE model. Report 2005:6. Chalmers University of Technology. 2005.
2. Vinnerås, B.; Palmquist, H.; Balmér, P.; Jönsson, H. The characteristics of household wastewater and biodegradable solid waste—A proposal for new Swedish design values. *Urban Water J.* **2006**, *3*, 3–11. <https://doi.org/10.1080/15730620600578629>
3. Van Nuijs, A.; Mougel, J-F.; Tarcomnicu, I.; Bervoets, L.; Blust, R.; Jorens, P.G.; Neels, H.; Covaci, A. Sewage epidemiology—A real-time approach to estimate the consumption of illicit drugs in Brussels, Belgium. *Environ. Int.* **2011**, *37*, 612–621. <https://doi.org/10.1016/j.envint.2010.12.006>
4. Press, C.; Davidsson, F.; Wellsjö, L.; Grubbström, E.; Rideliu, A. Hushållspillvattenundersökning. Report 2019:5. Gryaab. <https://www.gryaab.se/om-gryaab/publikationer-och-informationsmaterial/>
